# Supplementary material
Source: PubMed Central journal article supplement (PMC2644159)
Supplement: 0811168106_0811168106SI.pdf [file 0811168106_0811168106SI.pdf]

# Supporting Information

Honey et al. 10.1073/pnas.0811168106

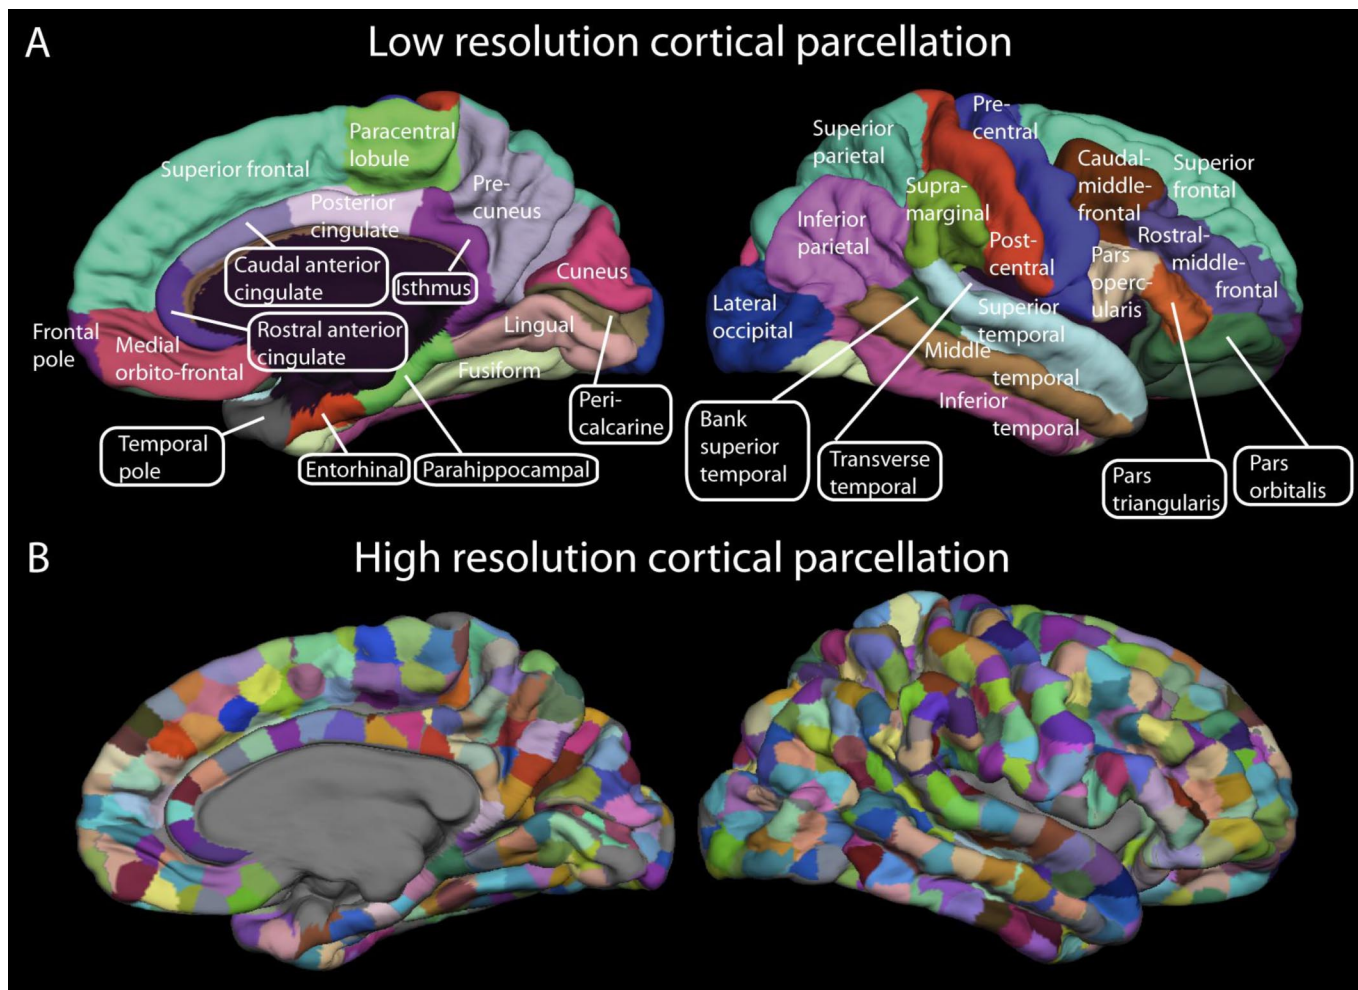

**Fig. S1.** (A) Low-resolution (66-region) and (B) high-resolution parcellations (998-ROI) of the cerebral cortex. In the article, the 66 cortical regions are labeled as follows: each label consists of two parts, a prefix for the cortical hemisphere (*r*, right hemisphere, *l*, left hemisphere) and 1 of 33 designators. BSTS, bank of the superior temporal sulcus; CAC, caudal anterior cingulate cortex; CMF, caudal middle frontal cortex; CUN, cuneus; ENT, entorhinal cortex; FP, frontal pole; FUS, fusiform gyrus; IP, inferior parietal cortex; IT, inferior temporal cortex; ISTC, isthmus of the cingulate cortex; LOCC, lateral occipital cortex; LOF, lateral orbitofrontal cortex; LING, lingual gyrus; MOF, medial orbitofrontal cortex; MT, middle temporal cortex; PARC, paracentral lobule; PARH, parahippocampal cortex; POPE, pars opercularis; PORB, pars orbitalis; PTRI, pars triangularis; PCAL, pericalcarine cortex; PSTS, postcentral gyrus; PC, posterior cingulate cortex; PREC, precentral gyrus; PCUN, precuneus; RAC, rostral anterior cingulate cortex; RMF, rostral middle frontal cortex; SF, superior frontal cortex; SP, superior parietal cortex; ST, superior temporal cortex; SMAR, supramarginal gyrus; TP, temporal pole; TT, transverse temporal cortex.

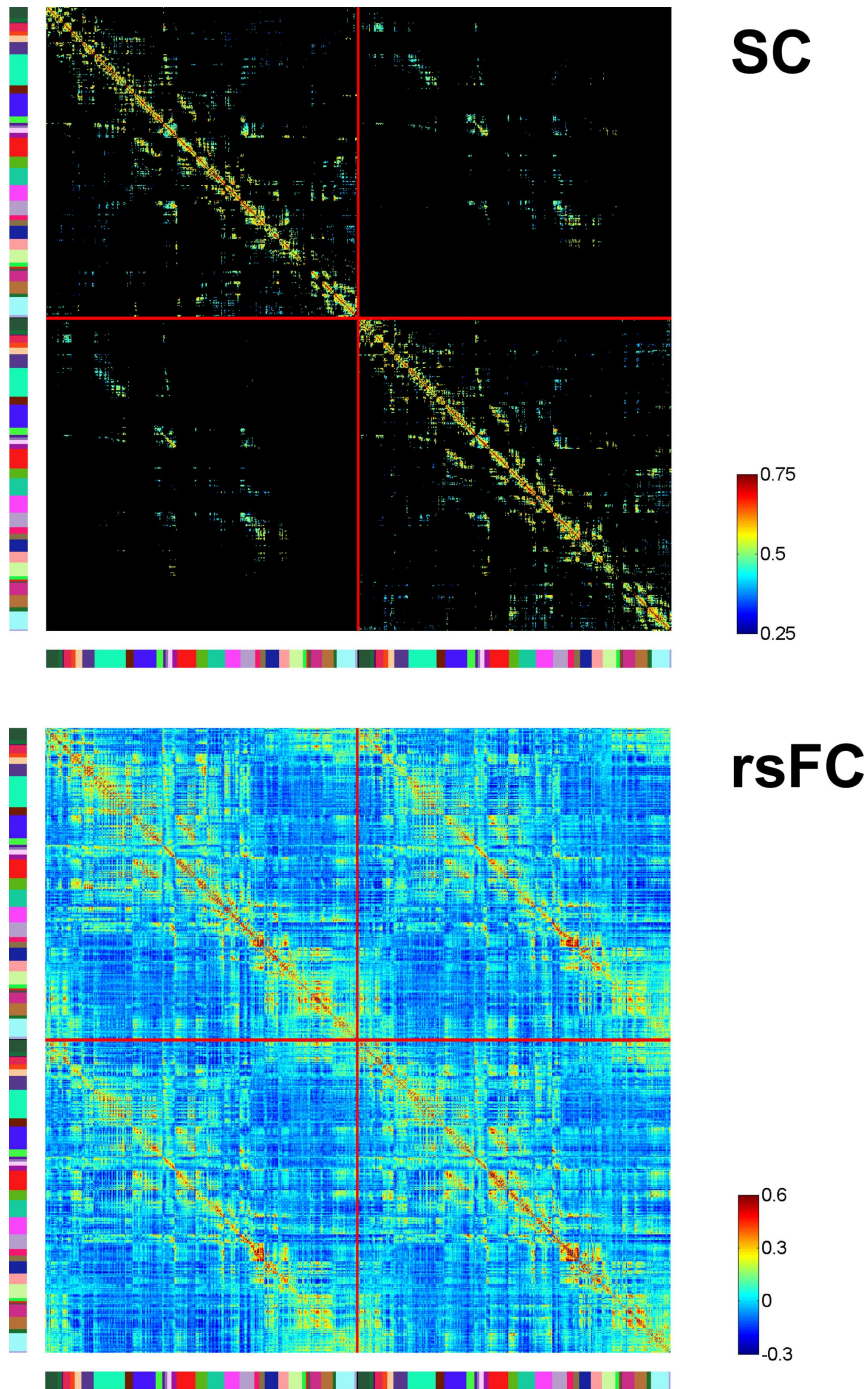

**Fig. S2.** Matrices of SC and empirical rsFC at the high resolution. Both plots represent averages across all 5 participants, including 2 structural scans for participant A, and 2 repeat functional scans for all 5 participants. The structural connection matrix is averaged after connection strengths were resampled to a Gaussian distribution with a mean of 0.5 and a standard deviation of 0.1. Connections that were present in only 1 out of 5 participants were set to zero strength. The functional connection matrix was computed from BOLD time series obtained for each ROI (see *Methods*). Each correlation value represents an average over 5 participants and 2 repeat scans per participant. The color bars at the left and bottom of the matrices indicate brain regions shown in a corresponding color map in Fig. S1.



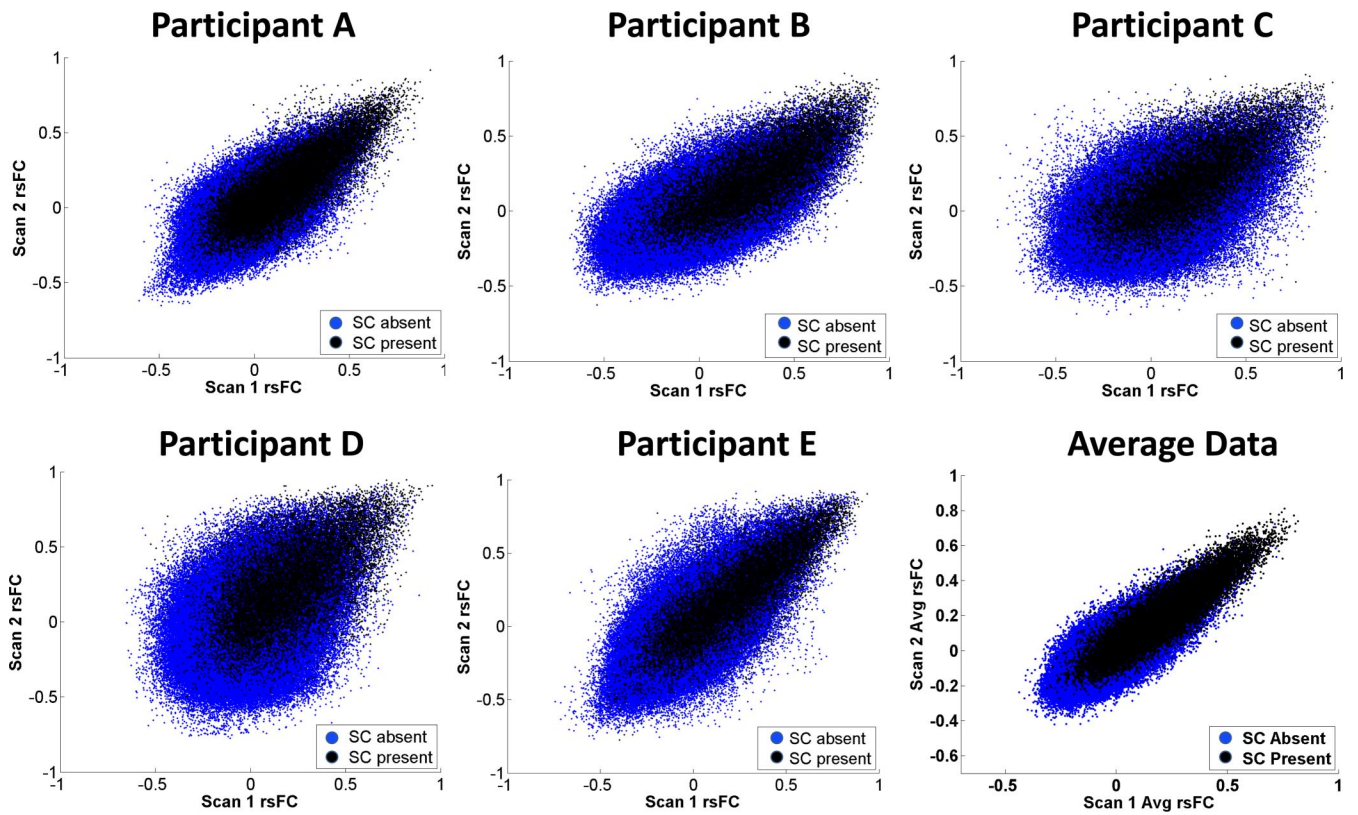

**Fig. S4.** Increased reliability of rsFC mediated by SC. The scatter plot shows rsFC from Scan 1 against rsFC from Scan 2, using high-resolution data for each of the 5 participants, as well as for participant-averaged SC and rsFC maps. Region-pairs with present SC in black, region-pairs without SC in blue.



**Table S1. Individual participant SC-rsFC and rsFC-distance correlations and corresponding values from individual runs of the computational model**

| Participant       | Pearson Correlation with rsFC |              |                        | Model R <sup>2</sup> SC and fiber bivariate |      |
|-------------------|-------------------------------|--------------|------------------------|---------------------------------------------|------|
|                   | SC (All)                      | SC (Present) | Inverse fiber distance |                                             |      |
| <b>66 Regions</b> |                               |              |                        |                                             |      |
| A                 | 0.59                          | 0.74         | 0.57                   | 0.61                                        | 0.59 |
| B                 | 0.56                          | 0.70         | 0.54                   | 0.59                                        | 0.54 |
| C                 | 0.45                          | 0.64         | 0.50                   | 0.50                                        | 0.44 |
| D                 | 0.59                          | 0.71         | 0.46                   | 0.61                                        | 0.50 |
| E                 | 0.60                          | 0.77         | 0.46                   | 0.70                                        | 0.60 |
| Avg participant   | 0.66                          | 0.82         | 0.67                   | 0.67                                        | 0.69 |
| <b>998 ROIs</b>   |                               |              |                        |                                             |      |
| A                 | 0.24                          | 0.42         | 0.39                   | 0.24                                        | 0.20 |
| B                 | 0.24                          | 0.48         | 0.47                   | 0.23                                        | 0.27 |
| C                 | 0.18                          | 0.39         | 0.40                   | 0.18                                        | 0.19 |
| D                 | 0.23                          | 0.42         | 0.40                   | 0.23                                        | 0.20 |
| E                 | 0.22                          | 0.42         | 0.39                   | 0.24                                        | 0.21 |
| Avg participant   | 0.36                          | 0.53         | 0.47                   | 0.30                                        | 0.30 |
| <b>998 Nodes</b>  |                               |              |                        |                                             |      |
| A                 | 0.30                          | 0.34         | 0.24                   | 0.25                                        | 0.12 |
| B                 | 0.39                          | 0.44         | 0.28                   | 0.35                                        | 0.19 |
| C                 | 0.35                          | 0.44         | 0.31                   | 0.33                                        | 0.20 |
| D                 | 0.33                          | 0.37         | 0.28                   | 0.26                                        | 0.15 |
| E                 | 0.35                          | 0.32         | 0.21                   | 0.25                                        | 0.11 |
| Avg participant   | 0.46                          | 0.52         | 0.41                   | 0.37                                        | 0.28 |

Individual participant SC-rsFC and rsFC-distance correlations (*Top 2 sections*), and corresponding values from individual runs of the computational model (*Bottom section*). Empirical rsFC is from the first fMRI scan; simulated rsFC is from a single 16 min simulation. The first 2 columns show the SC-rsFC correlations for "all region pairs" and for "region pairs with SC," respectively. The third column shows the correlation between rsFC and the inverse of fiber distance, and the fourth column shows the correlation between SC and the residuals of the distance-regression. The fifth column provides the full model R<sup>2</sup> of a bivariate linear regression of rsFC on SC and inverse fiber distance. The bottom row shows the results of each calculation performed using data averaged across participants (it is not the average of the rows above). All correlations are  $P \ll 1e-3$ .

**Table S2. Interparticipant SC-rsFC correlations**

|                  |   | Participant rsFC |       |       |       |       |
|------------------|---|------------------|-------|-------|-------|-------|
| All edges        |   | A                | B     | C     | D     | E     |
| Participant SC   | A | 0.237            | 0.211 | 0.164 | 0.205 | 0.197 |
|                  | B | 0.236            | 0.240 | 0.173 | 0.214 | 0.218 |
|                  | C | 0.232            | 0.224 | 0.180 | 0.215 | 0.204 |
|                  | D | 0.234            | 0.220 | 0.171 | 0.231 | 0.206 |
|                  | E | 0.222            | 0.212 | 0.165 | 0.210 | 0.225 |
| SC Present edges |   | A                | B     | C     | D     | E     |
| Participant SC   | A | 0.415            | 0.407 | 0.329 | 0.379 | 0.383 |
|                  | B | 0.426            | 0.476 | 0.353 | 0.413 | 0.414 |
|                  | C | 0.450            | 0.461 | 0.392 | 0.422 | 0.424 |
|                  | D | 0.410            | 0.429 | 0.342 | 0.416 | 0.380 |
|                  | E | 0.379            | 0.409 | 0.345 | 0.385 | 0.424 |

The rsFC map is from the first fMRI scan.

**Table S3. Individual participant SC-rsFC and rsFC-distance correlations calculated without resampling of SC values**

| Participant       | Pearson correlation with rsFC |              |                        |                    | Model R <sup>2</sup> SC and fiber bivariate |
|-------------------|-------------------------------|--------------|------------------------|--------------------|---------------------------------------------|
|                   | SC (All)                      | SC (Present) | Inverse fiber distance | Distance residuals |                                             |
| <b>66 Regions</b> |                               |              |                        |                    |                                             |
| A                 | 0.52                          | 0.66         | 0.55                   | 0.52               | 0.49                                        |
| B                 | 0.46                          | 0.57         | 0.51                   | 0.44               | 0.41                                        |
| C                 | 0.38                          | 0.53         | 0.49                   | 0.38               | 0.35                                        |
| D                 | 0.50                          | 0.60         | 0.45                   | 0.48               | 0.39                                        |
| E                 | 0.44                          | 0.57         | 0.44                   | 0.48               | 0.38                                        |
| Avg Participant   | 0.58                          | 0.71         | 0.66                   | 0.50               | 0.57                                        |
| <b>998 ROIs</b>   |                               |              |                        |                    |                                             |
| A                 | 0.18                          | 0.34         | 0.39                   | 0.21               | 0.19                                        |
| B                 | 0.15                          | 0.30         | 0.46                   | 0.13               | 0.24                                        |
| C                 | 0.13                          | 0.28         | 0.40                   | 0.14               | 0.18                                        |
| D                 | 0.16                          | 0.30         | 0.39                   | 0.17               | 0.18                                        |
| E                 | 0.16                          | 0.31         | 0.39                   | 0.19               | 0.19                                        |
| Avg Participant   | 0.30                          | 0.46         | 0.47                   | 0.27               | 0.28                                        |

rsFC is from the first fMRI scanning session. The SC strength is equal to the number of tractographic streamlines linking two ROIs, divided by the total area of the two ROIs. The first 2 columns show the SC-rsFC correlations for "all region pairs" and for "region pairs with SC," respectively. The third column shows the correlation between rsFC and the inverse of fiber distance, and the fourth column shows the correlation between SC and the residuals of the distance-regression. The fifth column provides the full model R<sup>2</sup> of a bivariate linear regression of rsFC on SC and inverse fiber distance. The bottom row shows the results of each calculation performed using data averaged across participants (it is not the average of the rows above).



**Table S4. Individual participant SC-rsFC and rsFC-distance correlations, after rsFC maps are Fisher-z transformed and then normalized to zero mean and unit variance across the 998 ROIs of each participant**

| Participant       | Pearson correlation with rsFC |              |                        |                    | Model R <sup>2</sup> SC and fiber bivariate |
|-------------------|-------------------------------|--------------|------------------------|--------------------|---------------------------------------------|
|                   | SC (All)                      | SC (Present) | Inverse fiber distance | Distance residuals |                                             |
| <b>66 Regions</b> |                               |              |                        |                    |                                             |
| A                 | 0.60                          | 0.75         | 0.55                   | 0.64               | 0.58                                        |
| B                 | 0.58                          | 0.71         | 0.52                   | 0.61               | 0.54                                        |
| C                 | 0.45                          | 0.64         | 0.49                   | 0.52               | 0.44                                        |
| D                 | 0.61                          | 0.71         | 0.45                   | 0.62               | 0.51                                        |
| E                 | 0.62                          | 0.77         | 0.44                   | 0.72               | 0.61                                        |
| Avg Participant   | 0.68                          | 0.82         | 0.66                   | 0.68               | 0.69                                        |
| <b>998 ROIs</b>   |                               |              |                        |                    |                                             |
| A                 | 0.25                          | 0.41         | 0.38                   | 0.24               | 0.20                                        |
| B                 | 0.25                          | 0.47         | 0.46                   | 0.24               | 0.25                                        |
| C                 | 0.19                          | 0.39         | 0.39                   | 0.19               | 0.18                                        |
| D                 | 0.24                          | 0.41         | 0.38                   | 0.24               | 0.20                                        |
| E                 | 0.24                          | 0.42         | 0.38                   | 0.26               | 0.21                                        |
| Avg Participant   | 0.38                          | 0.53         | 0.46                   | 0.32               | 0.30                                        |

The first 2 columns show the SC-rsFC correlations for "all region pairs" and for "region pairs with SC," respectively. The third column shows the correlation between rsFC and the inverse of fiber distance, and the fourth column shows the correlation between SC and the residuals of the distance-regression. The fifth column provides the full model R<sup>2</sup> of a bivariate linear regression of rsFC on SC and inverse fiber distance. The bottom row shows the results of each calculation performed using data averaged across participants (it is not the average of the rows above).

## Other Supporting Information Files

[SI Appendix](#)
